# Supplementary material for: A simple and rapid dual-cycle amplification strategy for microRNA based on graphene oxide and exonuclease III-assisted fluorescence recovery
Source: Royal Society of Chemistry journal article supplement (doi:10.1039/c8ay01106k), 2018-01-01
Supplement: c8ay01106k1.pdf [file c8ay01106k1.pdf]

# A simple and rapid dual-cycle amplification strategy for MicroRNA Based on Graphene Oxide and Exonuclease III-assisted fluorescence recovery

Yafang Tang, Mingxiu Liu, Lingcao Xu, Jianniao Tian\*, Xiulin Yang\*, Yanchun  
Zhao, Shulin Zhao

Key Laboratory for the Chemistry and Molecular Engineering of Medicinal Resources  
(Ministry of Education of China), School of Chemistry and Pharmaceutical Science of  
Guangxi Normal University, Guilin, 541004, China

Table S1 Oligonucleotides used in this work

| Name      | Sequences (5'-3')                      |
|-----------|----------------------------------------|
| H1        | GTGACAATGGACGTAGAAGGGTCCATTGTCACACTCCA |
| H2        | ATGGACGTAGAAGTGAGTTATTCTACGTCCATTGTCAC |
| P-DNA     | FAM-CACTTCTACGTCCATAGCTT               |
| miRNA-122 | UGGAGUGUGACAAUGGUGUUUG                 |
| miRNA-21  | UAG CUU AUC AGA CUG AUG UUG A          |
| miRNA-155 | UUA AUG CUA AUC GUG AUA GGG GA         |
| miRNA-205 | UCC UUC AUU CCA CCC GAG UCU G          |
| miRNA-221 | ACC UGG CAU ACA AUG UAG AUU U          |
| miRNA-223 | UGU CAG UUU GUC AAA UAC CCC A          |
| Let-7a    | UGA GGU AGU AGG UUG UAU AGU U          |
| ssNC      | UUG UAC UAC ACA AAA GUA CUG            |

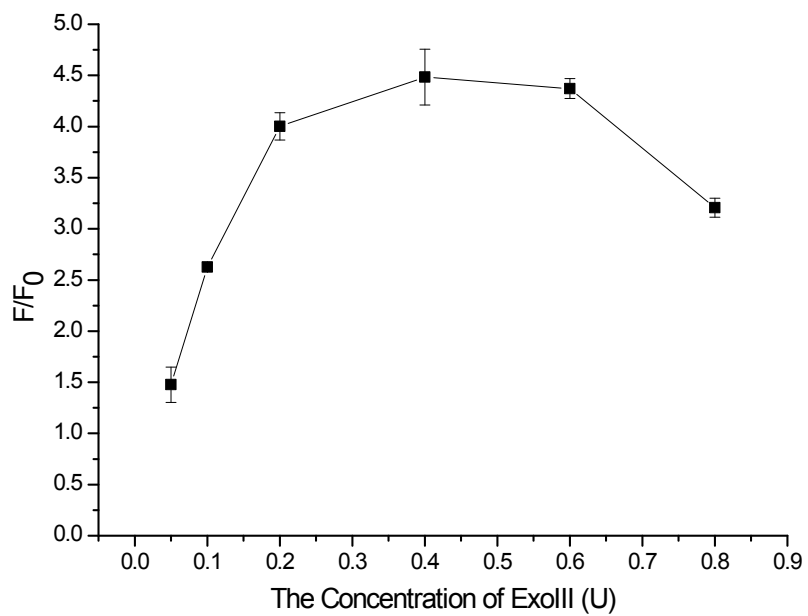

Figure S1 Effect of the mount of ExoIII on the fluorescence intensity ratio  $F/F_0$  response. Error bars show the standard deviations of three experiments. (50 nM  $H_1$ , 50 nM  $H_2$ , 50 nM P-DNA, 30 nM miRNA-122, 5  $\mu$ L GO, incubation temperature 37°C and incubation time 40 min)

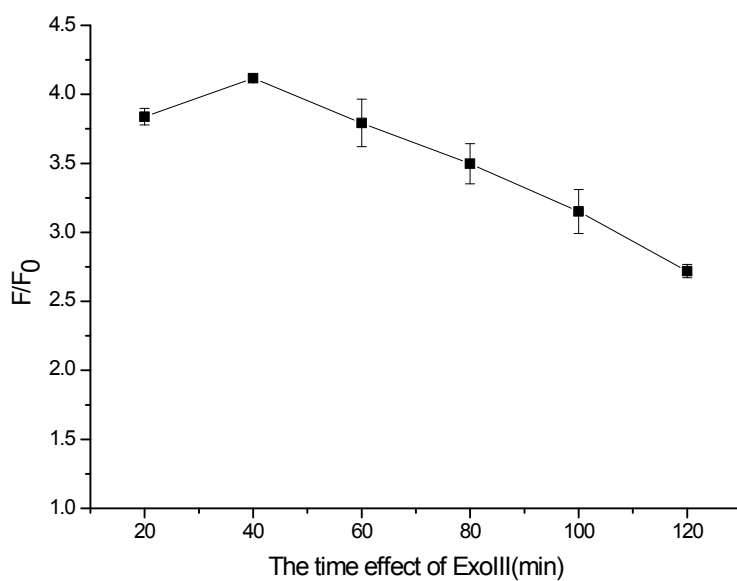

Figure S2 Effect of incubation time of the enzymatic reaction on the fluorescence intensity ratio  $F/F_0$  response. Error bars show the standard deviations of three experiments. (50 nM  $H_1$ , 50 nM  $H_2$ , 50 nM P-DNA, 30 nM miRNA-122, 0.4 U ExoIII, 5  $\mu$ L GO and incubation temperature 37°C)

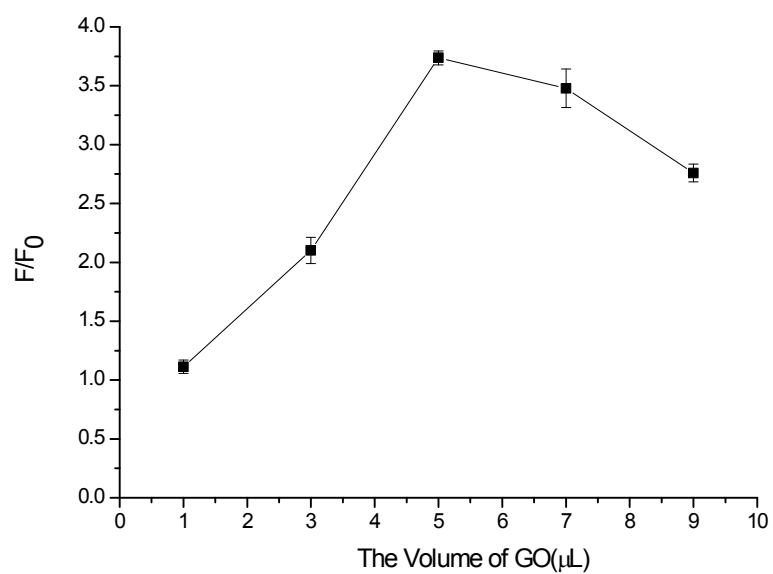

Figure S3 Effect of the volume of GO on the fluorescence intensity ratio  $F/F_0$  response. Error bars show the standard deviations of three experiments. (50 nM  $H_1$ , 50 nM  $H_2$ , 50 nM P-DNA, 30 nM miRNA-122, 0.4 U ExoIII, incubation temperature 37°C and incubation time 40 min)

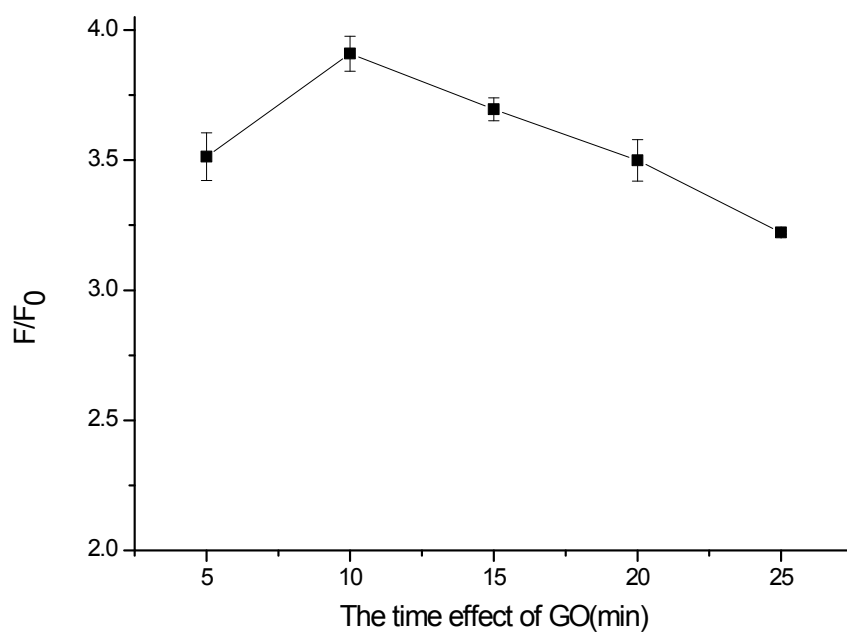

Figure S4 Effect of reaction time of GO on the fluorescence intensity ratio  $F/F_0$  response. Error bars show the standard deviations of three experiments. (50 nM  $H_1$ , 50 nM  $H_2$ , 50 nM P-DNA, 30 nM miRNA-122, 0.4 U ExoIII, 5  $\mu$ L GO incubation temperature 37°C and incubation time 40min)

Table S2 Comparison of Different Strategies for miRNA Detection

| Detection method  | Time   | Enzyme type | Detection limit | Reference |
|-------------------|--------|-------------|-----------------|-----------|
| Fluorescence      | 150min | polymerase  | 0.53 nM         | 1         |
| Fluorescence      | 90min  | DNase I     | 40 pM           | 2         |
| Chemiluminescence | 120min | DSN         | 49.6 pM         | 3         |
| Fluorescence      | 30min  | helicase    | 0.18 nM         | 4         |
| Phosphorescence   | 130min | DSN         | 0.16 nM         | 5         |
| Fluorescence      | 380min | polymerase  | 51 pM           | 6         |
| Fluorescence      | 50min  | ExoIII      | 21.4 pM         | This work |

### References

- 1 J.-J. Li, Q. Xi, W.-F. Du, R.-Q. Yu and J.-H. Jiang, *Analyst*, 2016, **141**, 2384-2387.
- 2 Z. Wang, J. Zhang, F. Chen and K. Cai, *Analyst*, 2017, **142**, 2796-2804.
- 3 Q. Wang, B.-C. Yin and B.-C. Ye, *Biosensors and Bioelectronics*, 2016, **80**, 366-372.
- 4 X. Fan, Y. Qi, Z. Shi, Y. Lv and Y. Guo, *RSC Advances*, 2017, **7**, 36444-36449.
- 5 J.-j. Yang, Z.-f. Zhang and G.-q. Yan, *Analytical Biochemistry*, 2017, **539**, 127-133.
- 6 H. Xu, D. Wu, Y. Zhang, H. Shi, C. Ouyang, F. Li, L. Jia, S. Yu and Z.-S. Wu, *Sensors and Actuators B: Chemical*, 2018, **258**, 470-477.
